# Supplementary material for: Correlation of periodontal and microbiological evaluations, with serum levels of estradiol and progesterone, during different trimesters of gestation
Source: PubMed Central journal article supplement (PMC6692383; doi:10.1038/s41598-019-48288-w), 2019-08-13
Supplement: 41598_2019_48288_MOESM1_ESM.pdf [file 41598_2019_48288_MOESM1_ESM.pdf]

## Correlation of periodontal and microbiological evaluations, with serum levels of estradiol and progesterone, during different trimesters of gestation.

Renata Santos de Souza Massoni<sup>1\*</sup>, Andreza Maria Fábio Aranha<sup>2</sup>, Fernanda Zanol Matos<sup>2+</sup>, Orlando Aguirre Guedes<sup>2+</sup>, Álvaro Henrique Borges<sup>2+</sup>, Monize Miotto<sup>2+</sup>, Alessandra Nogueira Porto<sup>2+</sup>

### TABLES

TABLE S1 - Comparison of clinical periodontal parameters between pregnancy and not pregnant (ANOVA test,  $p < 0.05$ ).

| Groups          |                    | Clinical Periodontal Parameters |       |       |       |
|-----------------|--------------------|---------------------------------|-------|-------|-------|
|                 |                    | PD                              | CIL   | VPI   | GBI   |
| PG <sup>a</sup> | Mean counts        | 2.41                            | 1.27  | 0.59  | 0.36  |
|                 | Median             | 2.35                            | 1.00  | 0,58  | 0.22  |
|                 | Standard deviation | 0.61                            | 0.74  | 0.35  | 0.34  |
| G4 <sup>b</sup> | Mean counts        | 2.33                            | 1.00  | 0.49  | 0.22  |
|                 | Median             | 2.30                            | 1.00  | 0.50  | 0.26  |
|                 | Standard deviation | 0.58                            | 0.74  | 0.31  | 0.17  |
| p-value         |                    | 0.624                           | 0.223 | 0.311 | 0.124 |

<sup>a</sup>PG: pregnant group = all pregnant women of the study (G1 + G2 + G3);

<sup>b</sup>G4 = nonpregnant group.

TABLE S2 - Association between the amount of Tf and the periodontal clinical diagnosis (ANOVA test,  $p < 0.05$ ).

| Groups          | Bacterial Quantification | Health | Clinical Periodontal Diagnosis |                | Health |
|-----------------|--------------------------|--------|--------------------------------|----------------|--------|
|                 |                          |        | Gingivitis                     | Periodontitis  |        |
| 1               | n/N <sup>b</sup>         | 6/16   | 10/16                          | 0/16           |        |
|                 | Mean counts              | 16.094 | 314.093                        | -              | 0,079  |
|                 | Median                   | 124    | 117.005                        | -              |        |
|                 | Standard deviation       | 39.094 | 378.808                        | -              |        |
| 2               | n/N                      | 7/21   | 7/21                           | 7/21           |        |
|                 | Mean counts              | 14.468 | 91.976                         | 97.375         | 0,454  |
|                 | Median                   | 1.175  | 1.027                          | 1.024          |        |
|                 | Standard deviation       | 26.630 | 145.232                        | 181.705        |        |
| 3               | n/N                      | 6/15   | 5/15                           | 4/15           |        |
|                 | Mean counts              | 27     | 41.870                         | 65.738         | 0,073  |
|                 | Median                   | 30     | 61.592                         | 37.468         |        |
|                 | Standard deviation       | 25     | 36.642                         | 70.709         |        |
| PG <sup>a</sup> | n/N                      | 19/52  | 22/52                          | 11/52          |        |
|                 | Mean counts              | 10.421 | 181.551                        | 85.871         | 0,031* |
|                 | Median                   | 94     | 55.519                         | 17.936         |        |
|                 | Standard deviation       | 26.721 | 288.904                        | 146.850        |        |
| 4               | n/N                      | 8/15   | 6/15                           | 1/15           |        |
|                 | Mean counts              | 246    | 456                            | 986            | 0,334  |
|                 | Median                   | 0      | 405                            | 986            |        |
|                 | Standard deviation       | 456    | 503                            | - <sup>c</sup> |        |

<sup>a</sup>PG: pregnant group = all pregnant women of the study (G1 + G2 + G3)

<sup>b</sup>n/N: n = number of patients positive for each organism/N = number of patients in each group;

<sup>c</sup>As only 1 patient was diagnosed with periodontitis, there is no standard deviation.

\*Significative p-value
